# Supplementary material for: Wnt activity and basal niche position sensitize intestinal stem and progenitor cells to DNA damage
Source: PubMed Central journal article supplement — EMBO J. 2015 Jan 21;34(5):624–40. doi: 10.15252/embj.201490700 (PMC4365032; doi:10.15252/embj.201490700), 2015-01-21
Supplement: embj0034-0624-sd1.pdf [file embj0034-0624-sd1.pdf]

# **Wnt activity and basal niche position sensitize intestinal stem and progenitor cells to DNA damage**

Si Tao<sup>1,2,3</sup>, Duo Zhuang Tang<sup>2</sup>, Yohei Morita<sup>2</sup>, Tobias Sperka<sup>2</sup>, Omid Omrani<sup>2</sup>, André Lechel<sup>4</sup>, Vadim Sakk<sup>5</sup>, Johann Kraus<sup>6</sup>, Hans A. Kestler<sup>2,6</sup>, Michael Kühl<sup>1,#</sup>, K. Lenhard Rudolph<sup>2,#</sup>

## **Supplementary Information**

**Figure S1. Expression of differentiation markers in intestinal stem and progenitor cells.**

mRNA expression of indicated genes relative to *GAPDH* in LGR5<sup>hi-high</sup>, LGR5<sup>hi-low</sup>, LGR5<sup>lo-high</sup>, and LGR5<sup>lo-low</sup> populations (n=3 mice). Mean values ± SEM are given.

**Figure S2. Young G3 *mTerc*<sup>-/-</sup> mice do not lose LGR5-GFP<sup>+</sup> intestinal stem and progenitor cells.**

(A–D) Representative FACS plots of small intestinal crypt cells of 2-3 month old LGR5-GFP<sup>ki</sup>, *mTerc*<sup>+/+</sup> mice and LGR5-GFP<sup>ki</sup>, G3 *mTerc*<sup>-/-</sup> mice.

**Figure S3. Telomere dysfunction leads to preferential depletion of position 1 and 2 cells at the crypt bottom in between Paneth cells.**

Representative pictures of HE staining of small intestinal tissue sections of 12-16 month old G3 *mTerc*<sup>-/-</sup> mice (D-F) and age matched *mTerc*<sup>+/+</sup> mice (A-C). Arrow heads and numbers indicate the positions of intestinal stem and progenitor cells (ISPCs) in the basal crypts. Scale bars: 20µm. Note the spindle shaped CBC cells in between Paneth cells are depleted in old G3 *mTerc*<sup>-/-</sup> mice.

**Figure S4. Irradiation leads to preferential depletion of position 1 and 2 cells at the crypt bottom in between Paneth cells.**

(A-C) 3 month old *mTerc*<sup>+/+</sup> mice were exposed to 12Gy  $\gamma$ -irradiation. Small intestinal tissue was collected at 24h after irradiation or from non-irradiated mice (n=4 mice per group). (A,B) Representative pictures of Msi1 staining. Arrow heads and numbers indicate ISPC positions in the crypts. Scale bar: 20µm. (C) Quantification of Msi1<sup>+</sup> ISPCs at indicated positions in the crypt base. (D) 3-month old LGR5-GFP<sup>ki</sup>, *mTerc*<sup>+/+</sup> mice were exposed to 12 Gy  $\gamma$ -irradiation. Small intestinal tissue was collected at 24 hours after IR. The histogram depicts quantification of GFP-staining intensity of ISPCs at indicated positions in positively stained basal crypts. Note that the staining intensity of position 4 cells is equal in irradiated and non-irradiated mice, and is significantly lower than position 1 and 2 cells of non-irradiated mice. Mean values  $\pm$  SEM are given.

**Figure S5. Increased sensitivity of Wnt<sup>hi</sup> cells compared to Wnt<sup>lo</sup> cells is not related to differences in cell cycle activity.**

(A-D) Immunofluorescence staining of PCNA and Ki67 on small intestinal sections of 3-month old *mTerc*<sup>+/+</sup> mice (n=4 mice per group). (A, B) Representative pictures. Arrow heads and numbers indicate positions of the ISPCs in the crypt base. Scale bar: 20µm.

(C, D) Percentage of PCNA or Ki67 positive ISPCs at indicated positions in basal crypts.

(E-I) 2-3 month old LGR5-GFP<sup>ki</sup>, *mTerc*<sup>+/+</sup> mice were exposed to 12 Gy  $\gamma$ -irradiation.

Small intestinal tissue was collected at indicated time points and analyzed by flow

cytometry (n=4-10 mice per group). (E-H) Representative FACS plots. (I) Quantification

of cell cycle profiles of LGR5<sup>hi</sup> and LGR5<sup>lo</sup> cells at indicated time points as determined

by flow cytometry analysis. Mean values  $\pm$  SEM are given. NIR=non-irradiated;

IR=irradiated.

**Figure S6. Original Western blots related to Fig. 6 C.**

LGR5<sup>hi</sup> and LGR5<sup>lo</sup> cells were freshly isolated from 3-month old LGR5-GFP<sup>ki</sup> mice 6 h after 12Gy  $\gamma$ -irradiation (IR) or from non-irradiated (NIR) mice (n=3 mice per group).

Original scan of representative Western Blots were shown. Red boxes indicate areas used for Fig. 6 C.

**Figure S7. Instructed modification of canonical Wnt/ $\beta$ -catenin signaling activity.**

(A) mRNA expression of *Axin2* relative to *GAPDH* in isolated LGR5<sup>hi</sup> and LGR5<sup>lo</sup> cells from cultured crypts of 2-3 month old LGR5-GFP<sup>ki</sup> mice at indicated time points after  $\gamma$ -irradiation with 6Gy (IR) or non-irradiated (NIR) controls (n=4 independent experiments).

(B-E) Crypts of 2-3 month old LGR5<sup>ki</sup> mice were cultured, and were exposed to the indicated treatment on day 9 of culture. 16 h after treatment, cells were harvested to check for cell cycle and Wnt activity. (n=4 independent experiments per group.) (B, C) mRNA expression of *Axin2* was measured in relation to *GAPDH* mRNA expression by qPCR. (B) Inhibition of Wnt signaling was achieved by adding DKK1 to the culture medium or reducing R-spondin by 50% (50% Rspo). *Axin2* mRNA expression level was normalized to 1 in control cells. (C) Activation of Wnt signaling was achieved by treatment with 6-BIO. Me-BIO served as control. *Axin2* mRNA expression level was normalized to 1 in Me-BIO treated cells. (D, E) Flow cytometry analysis of cell cycle profiles of LGR5<sup>+</sup> cells from non-irradiated crypt organoid cultures exposed to the indicated treatments. (F) 2 month old LGR5-GFP<sup>ki</sup>, *mTerc*<sup>+/+</sup> mice were i.v. injected with anti-LRP6 antibody or IgG which serves as a vehicle control. LGR5<sup>hi</sup> cells of small intestinal epithelial cells were FACS purified 12 h after injection. mRNA expression of *Axin2* was measured in relation to *GAPDH* mRNA expression by qPCR. *Axin2* mRNA expression level was normalized to 1 in control group. Results are displayed as mean  $\pm$  SEM.

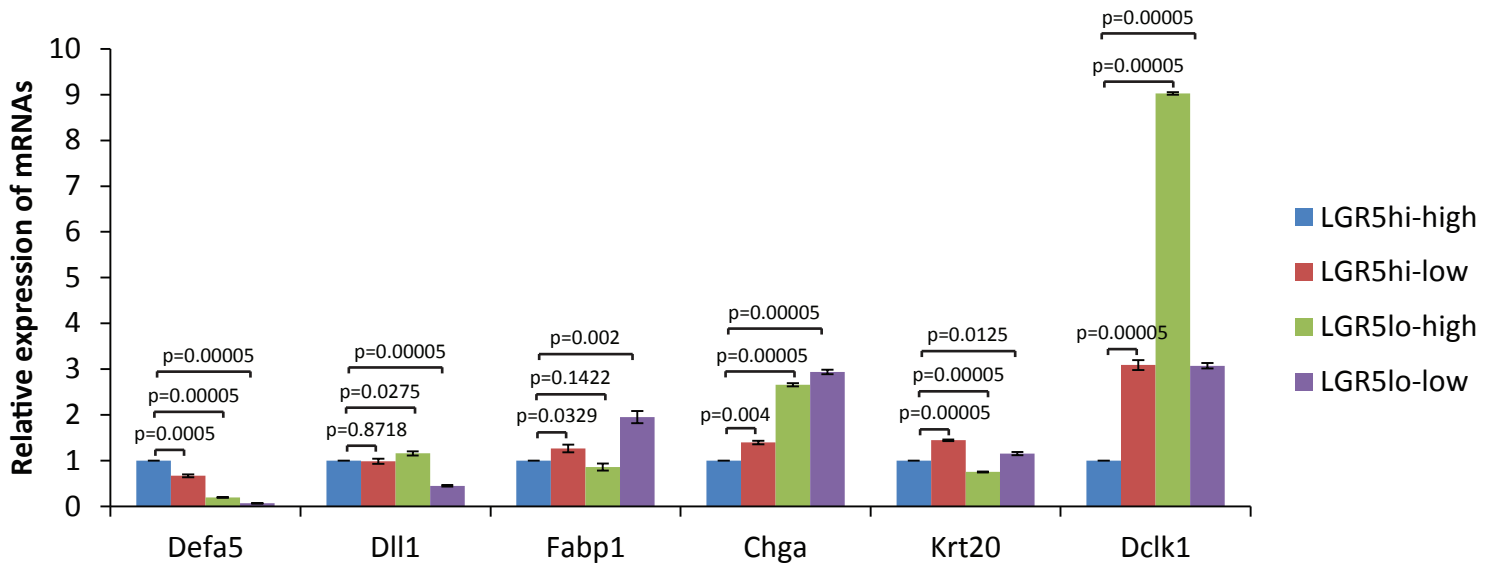

Tao et al., Supplementary Figure S1.

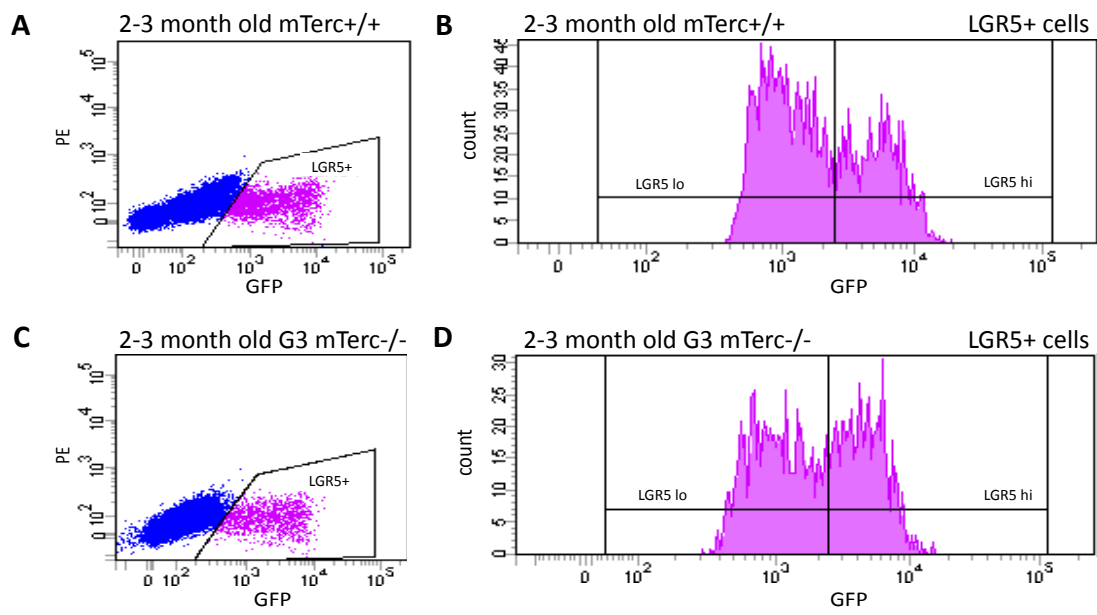

Tao et al., Supplementary Figure S1.

**mTerc<sup>+/+</sup>**

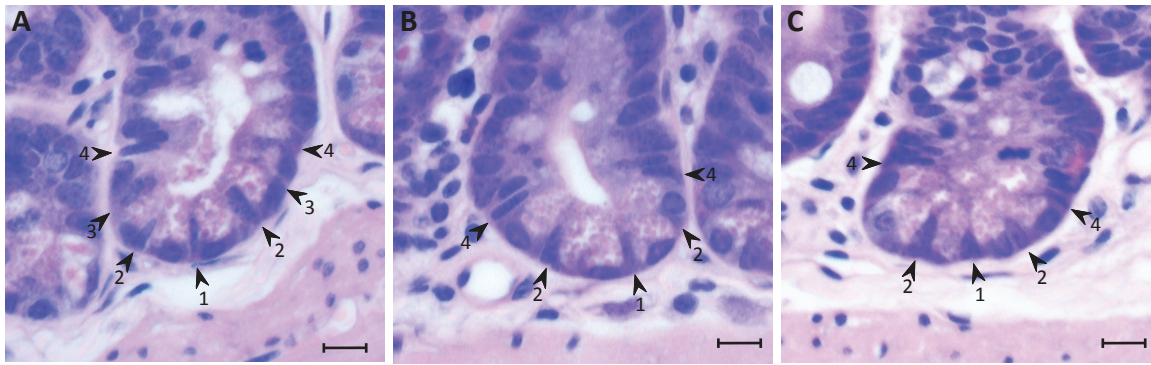

**G3 mTerc<sup>-/-</sup>**

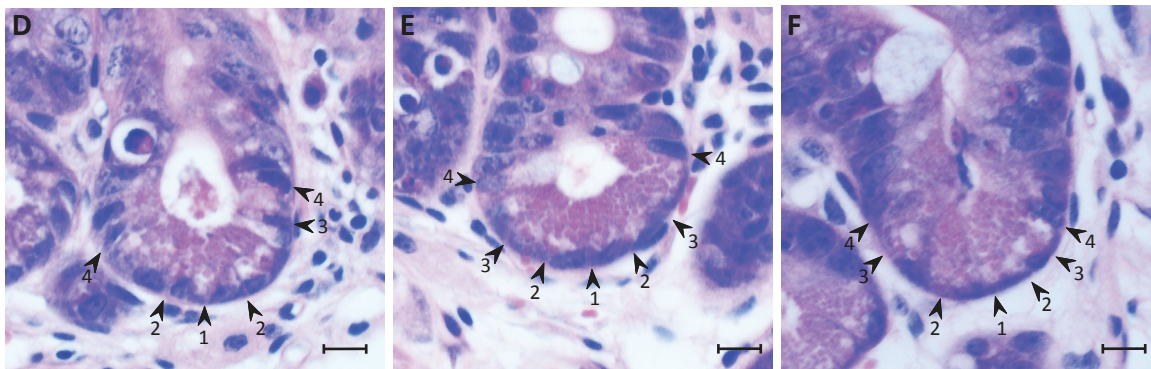

Tao et al., Supplementary Figure S3.

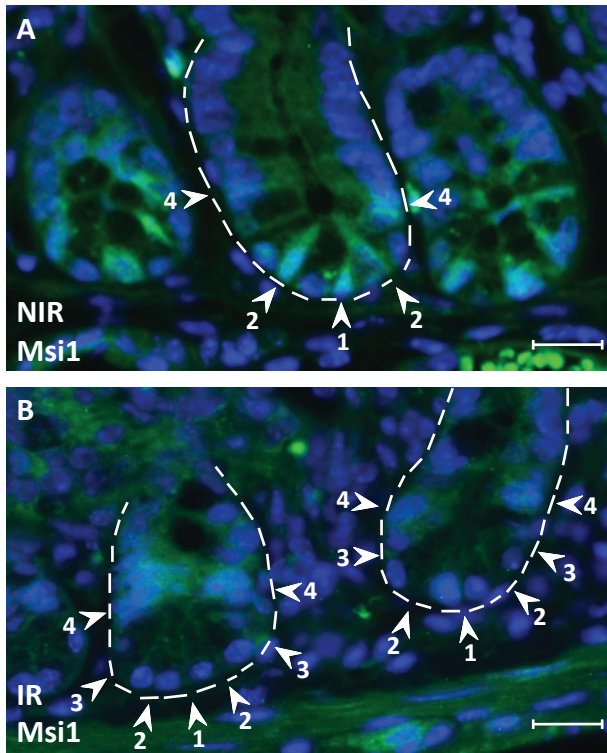

**C**

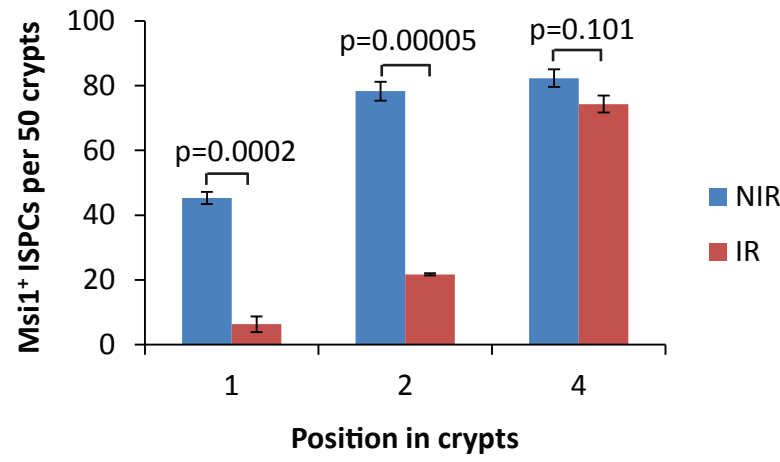

**D**

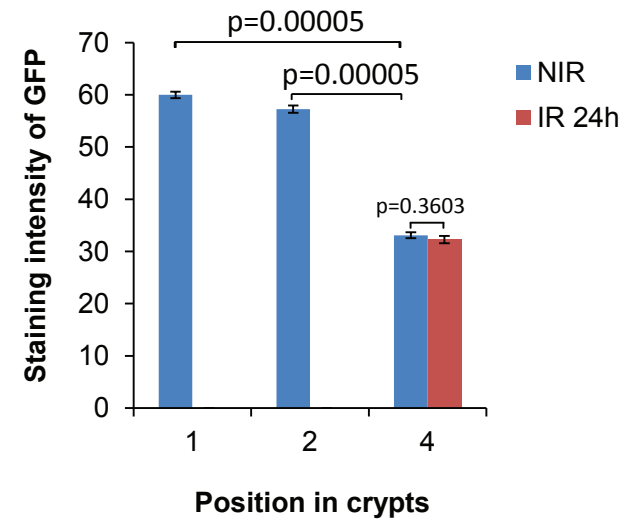

Tao et al., Supplementary Figure S4.



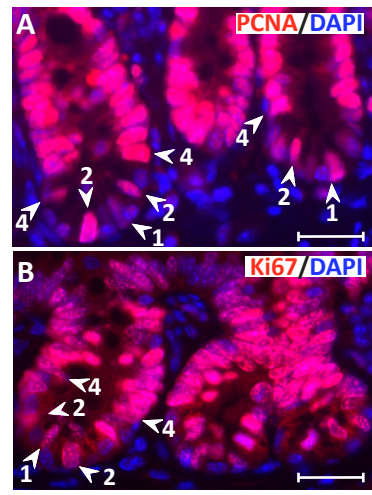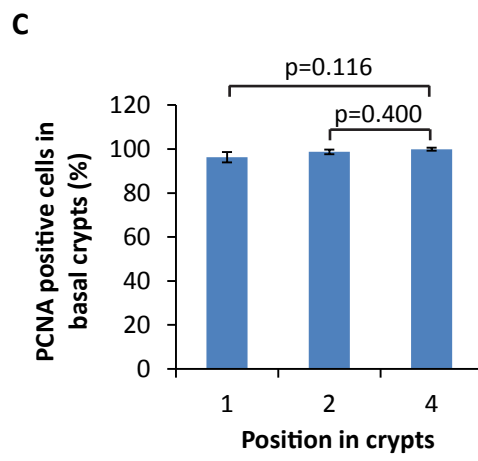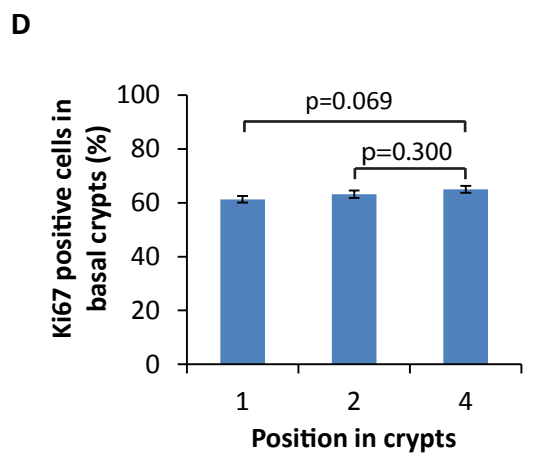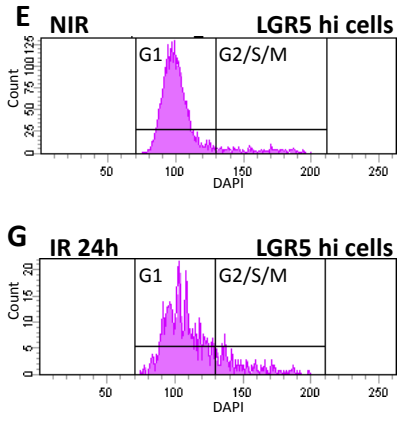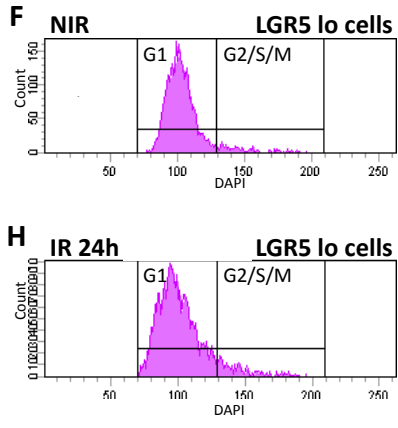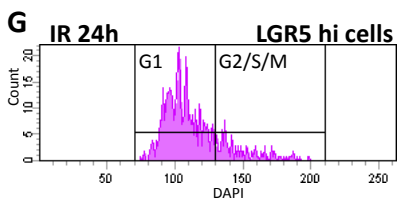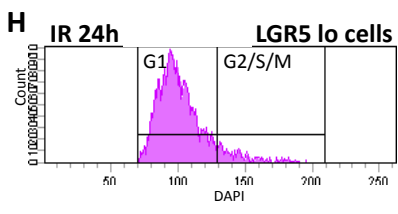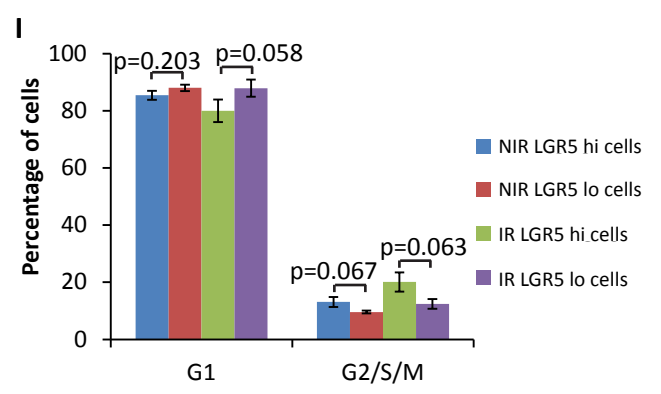

Tao et al., Supplementary Figure S5.

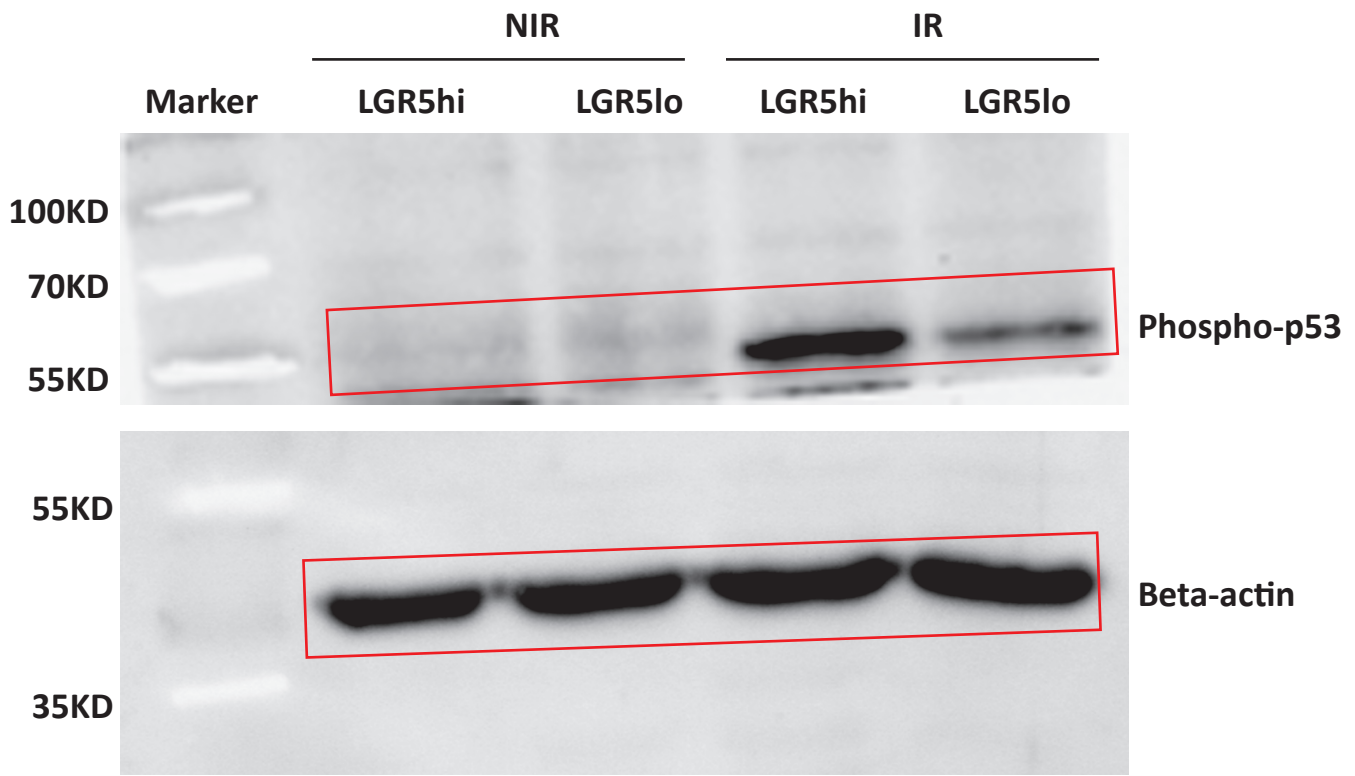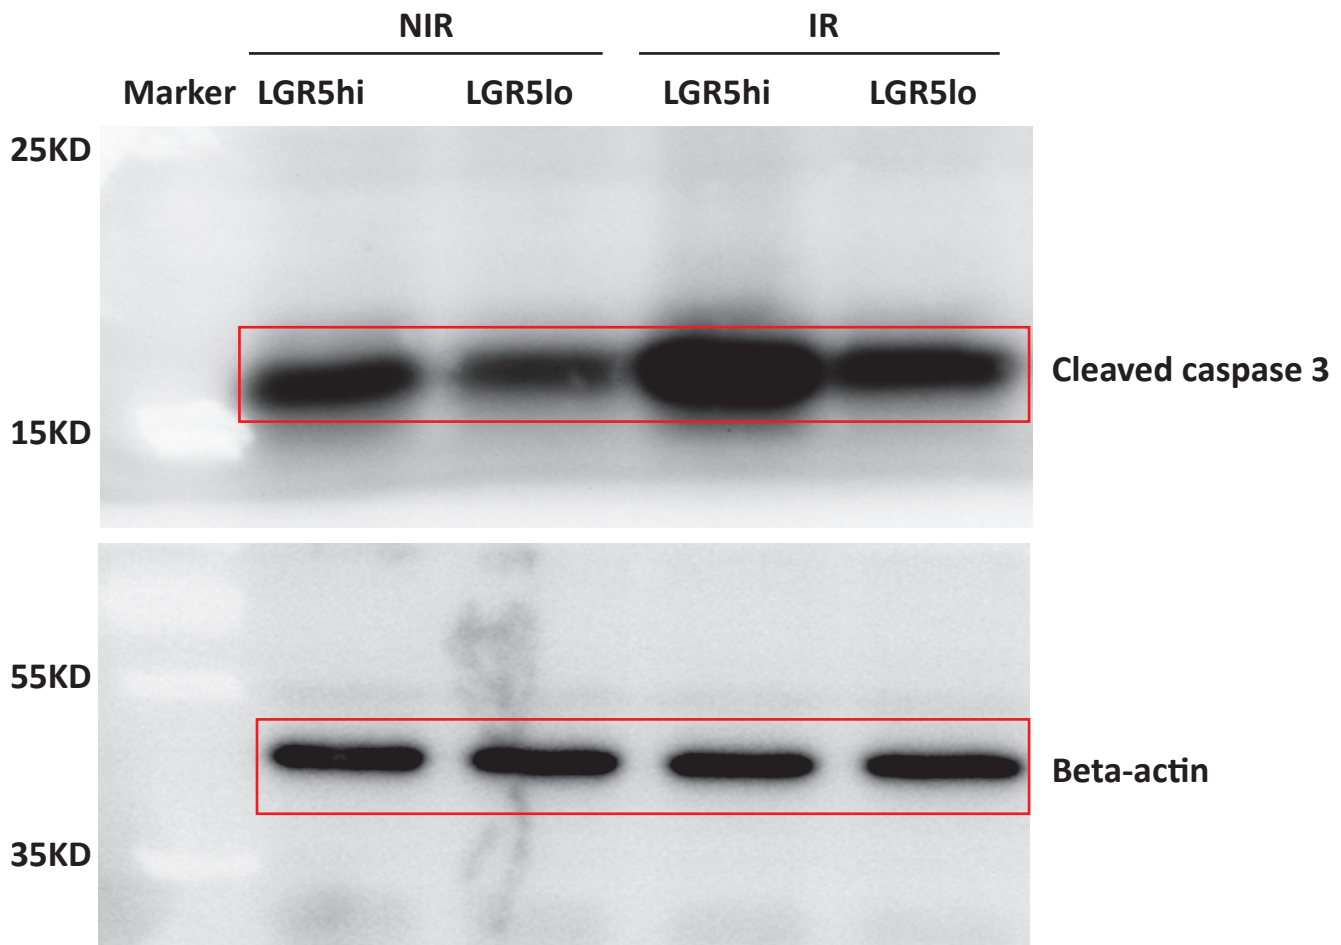

Tao et al., Supplementary Figure S6.

**A**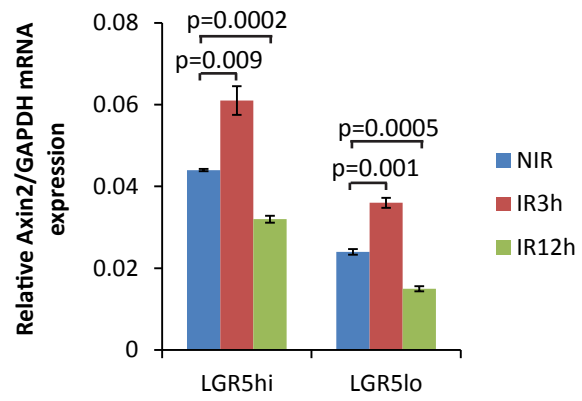**B**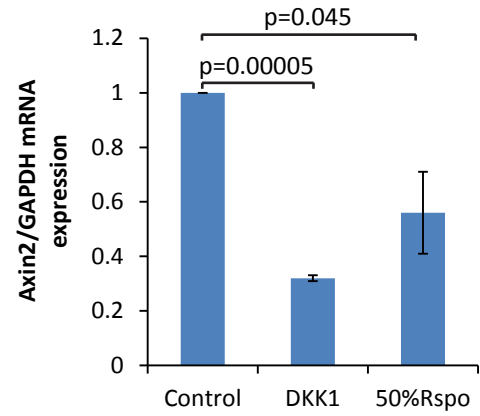**C**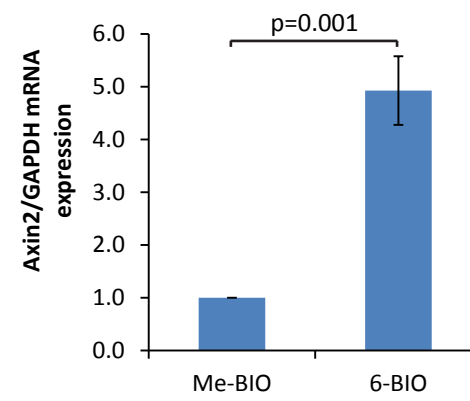**D**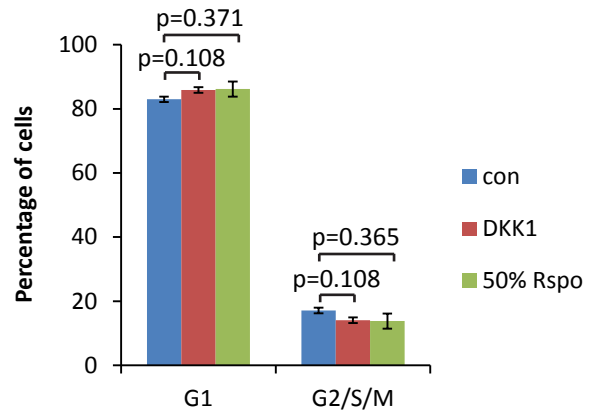**E**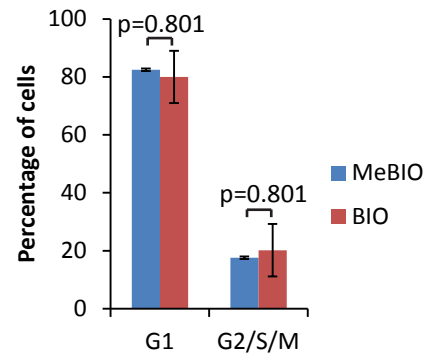**F**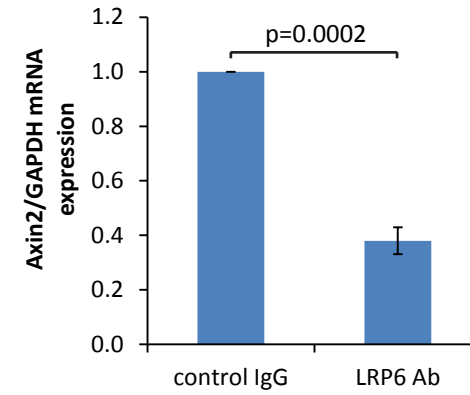

**Table S1. Primer list**

| Gene symbol   | Left primer            | Right primer           |
|---------------|------------------------|------------------------|
| Axin2         | gagagtgagcggcagagc     | cggctgactcgttctct      |
| Ascl2         | gagagctaagcccgatgga    | tcagtagccccctaaccaac   |
| Bbc3 (PUMA)   | tggagggtcatgtacaatctct | gttgggtccatttctgg      |
| Bok           | agtggcaggccacatctt     | ccacggaatacagggacacta  |
| Cdkn1a (p21)  | aacatctcagggccgaaa     | tgcgcttgagtgatagaaa    |
| Chga          | cgatccagaaagatgatggtc  | cggagcctctgtctttcc     |
| Dclk1         | ttcaacacaggcccaag      | ccttatcaagagcgggtggtt  |
| Defa5         | caggctgatcctatccacaaa  | ggcctcaaaggagatagaca   |
| Dll1          | gggacagaggggagaagatg   | tccatgttggcatcacacc    |
| Fabp1         | ccatgactggggaaaaagtc   | gcctttgaaagttgtccacat  |
| Fzd1          | cagcagtacaacggcgaac    | gagatgggctggcagtagc    |
| Fzd7          | cgcttcagcgtgctctaca    | tcataaaagtagcaggccaaca |
| Krt20         | agctgagacgcacctaccag   | tgcgctccagagactctttc   |
| Lef1          | tcctgaaatccccaccttct   | tgggataaacaggctgacct   |
| Msi1          | gaggactcagttggcagacc   | ctctttcacctccccgaact   |
| Pmaip1 (NOXA) | cagatgcctgggaagtgcg    | tgagcacactcgtccttcaa   |
| Tcf4          | gaaaagttcctccgggtttg   | tcctgtttagtcggcagtg    |
| Wnt10a        | agccagcacgtcttgagg     | gtcgttgggtgctgacct     |
